# Supplementary material for: 2H NMR calculations on polynuclear transition metal complexes: on the influence of local symmetry and other factors
Source: Royal Society of Chemistry journal article supplement (doi:10.1039/c1cp22081k), 2011-01-01
Supplement: c1cp22081k.pdf [file c1cp22081k.pdf]

# $^2\text{H}$ NMR calculations on polynuclear transition metal complexes: on the influence of local symmetry and other factors. Eelectronic Supporting Information

Iker del Rosal,<sup>a</sup> Torsten Gutman,<sup>b</sup> Bernadeta Walaszek,<sup>c</sup> Iann C. Gerber,<sup>a</sup> Bruno Chaudret,<sup>a</sup> Hans-Heinrich Limbach,<sup>c</sup> Gerd Buntkowsky,<sup>d</sup> and Romuald Poteau,<sup>\*a</sup>

DOI: 10.1039/b000000x

## Computational details

In nuclei like deuterium the nuclear quadrupole moment interact with the electric field gradient (EFG) arisen at these sites. This interaction is described by the quadrupolar coupling constant  $C_Q$  and the asymmetry parameter  $\eta_Q$ . In principle these parameters can be obtained by quantum mechanical DFT calculations<sup>1-4</sup> which allow the determination of the electric field tensor  $\overline{V}$ . A given matrix element is calculated by the formula<sup>3</sup>:

$$\overline{V}_{ij}(\mathbf{r}) = \frac{\partial E_i(\mathbf{r})}{\partial r_j} - \frac{1}{3} \delta_{ij} \sum_k \frac{\partial E_k(\mathbf{r})}{\partial r_k} \quad (1)$$

where  $i, j, k$  stands for  $x, y, z$  and  $E_k(\mathbf{r})$  is the  $k^{\text{th}}$  component of the electric field at position  $\mathbf{r}$ .

$C_Q$  (eq. 2) and  $\eta_Q$  (eq. 3) are calculated from the EFG tensor eigenvalues  $V_{11}, V_{22}, V_{33}$ , with the convention:  $|V_{11}| \leq |V_{22}| \leq |V_{33}|$  (i.e.  $V_{33}$  is the principal component):

$$C_Q = \frac{eQV_{33}}{h} \quad (2)$$

$$\eta_Q = \frac{|V_{22}| - |V_{11}|}{|V_{33}|} \quad (3)$$

where  $Q$  is the nuclear quadrupole moment ( $Q = 0.00286$  barns for  $^2\text{H}$ ). The conversion from atomic units to kHz is:

$$C_Q \text{ (kHz)} = 672 \times V_{33} \text{ (u.a.)} \quad (4)$$

<sup>a</sup> Université de Toulouse; INSA, UPS, CNRS; LPCNO, 135 avenue de Rangueil, F-31077 Toulouse, France. Fax: 0033 561559697; Tel: 0033 561559664; E-mail: romuald.poteau@univ-tlse3.fr

<sup>b</sup> Université de Toulouse; UPS, CNRS; LCC, 205 route de Narbonne, F-31077 Toulousequadrupolae, France

<sup>c</sup> Institut für Physikalische und Theoretische Chemie, Freie Universität Berlin, Takustr. 3, D-14195 Berlin, Germany.

<sup>d</sup> Eduard-Zintl-Institut für Anorganische und Physikalische Chemie, Technische Universität Darmstadt, Petersenstr. 20, D-64287 Darmstadt.

$C_Q$  are related to the experimental quadrupolar splitting value  $\Delta\nu_Q$ <sup>5</sup>, which, at low temperatures where no significant motional processes on the NMR time scale occur, is directly related to the EFG eigenvalue  $V_{33}$  by

$$\Delta\nu_Q = \frac{3}{4} C_Q = \frac{3}{4} \frac{eQ}{h} V_{33} \quad (5)$$

In the case of deuterium atoms, equation 5 simply writes:

$$\Delta\nu_Q = \frac{3}{4} \times 672 \times V_{33} = 504 \times V_{33} \quad (6)$$

All molecular DFT calculations were performed with Gaussian03.<sup>6</sup> The  $[\text{Ru}_4]$  as well as the  $\text{H}_2\text{Ru}_6(\text{CO})_{18}$  and  $[\text{HRu}_6(\text{CO})_{18}]^-$  cluster geometries considered in the present work are taken from a previous study.<sup>7</sup> Geometries had been fully optimized in gas phase without symmetry constraints, employing the PBE0 functional<sup>8</sup> and a polarized double-zeta quality basis set. In order to be consistent with that study, the most stable geometry of  $[\text{H}_3\text{Ru}_6(\text{CO})_{18}]^+$ , initially proposed in another previous work<sup>9</sup>, has been optimized again at the same level of calculation and other isomers have been found on the potential energy surface. A small set of tetrahedral  $\text{H}_4\text{M}_4(\text{CO})_{12}$  clusters has also been considered in order to assess the possible effect of the metal M on  $C_Q$  and  $\eta_Q$  ( $M = \text{Re}, \text{Tc}, \text{Os}, \text{Fe}$ ). Unrestricted-DFT calculations of the singlet and triplet states have been done in several cases in order to take care of the possible magnetism of some of these clusters. It could in particular have been the case for those that break the electron-counting rule, namely  $\text{H}_4\text{Ru}_4(\text{C}_6\text{H}_6)_2^+$ , the strongly electron deficient  $\text{H}_2\text{Ru}_4(\text{CO})_9$  cluster or  $\text{H}_4\text{M}_4(\text{CO})_{12}$  clusters ( $M = \text{Re}, \text{Tc}$ ).

Calculations of EFG tensors were done using the B3PW91 functional<sup>10-16</sup> and the Stuttgart effective core potential for Ru, Fe, Re and Os,<sup>17</sup> augmented with one polarization function ( $\zeta_f(\text{Ru}) = 1.235$ ,  $\zeta_f(\text{Fe}) = 2.462$ ,  $\zeta_f(\text{Re}) = 0.869$ ,  $\zeta_f(\text{Os}) = 0.886$ ,  $\zeta_f(\text{Tc}) = 1.134$ ). For the other elements (H, C, O, and P) Dunning's correlation consistent basis set cc-pVTZ<sup>18,19</sup> has been used. We have already proved on some test cases that quadrupolar coupling constants calculated on triple- $\zeta$  and double- $\zeta$  basis sets' geometries differ by less than

2%, owing to the local character of this property.<sup>20</sup> Due to the large dimension of some TM complexes we have considered that performing geometry optimizations and EFG tensor calculations in the same expensive triple- $\zeta$  quality basis set leads no significant enhancement of the results. The structures labelling is consistent with the one adopted in Ref. 7. The quadrupolar parameters published in Ref. 9 have been computed, with a somewhat lower accurate level of calculation, only for the carbonyl-ruthenium clusters hereafter named **1<sup>CO</sup>**, **1<sup>'CO</sup>**, **13**, **13'**, and **14a**. For the sake of consistency, they have been systematically recalculated within the cc-pVTZ basis set and the Stuttgart effective core potentials. This small sample of clusters is completed in the present work by a wide set of [Ru<sub>4</sub>] clusters with CO, PH<sub>3</sub>, PF<sub>3</sub>, AsH<sub>3</sub> and C<sub>6</sub>H<sub>6</sub> ligands,<sup>7</sup> together with an electron deficient [Ru<sub>4</sub>] cluster, an extended set of [H<sub>3</sub>Ru<sub>6</sub>(CO)<sub>18</sub>]<sup>+</sup> isomers and other H<sub>4</sub>M<sub>4</sub>(CO)<sub>12</sub> clusters (with M = Re, Tc, Os, Fe).

Owing to the debate about the isomerization process of H<sub>4</sub>Ru<sub>4</sub>(CO)<sub>12</sub><sup>21,22</sup> and for the purpose of checking the possible effect of crystal packing on the isomerization pathway of this compound, periodic boundary computations were performed on this particular case within the framework of the density functional theory (DFT) considering the spin unpolarized constraint. The exchange-correlation potential was approximated by the generalized gradient approach proposed by Perdew, Burke, and Ernzerhof (PBE).<sup>23,24</sup> Calculation of the energetic parameters, as well as the geometry optimizations were carried out using the projector augmented waves (PAW) full-potential reconstruction<sup>25,26</sup> implemented in the Vienna *ab initio* simulation package VASP.<sup>27,28</sup> We found that a kinetic energy cutoff of 500 eV was sufficient to achieve a total energy convergence within several millielectronvolts. Atoms were free to move until the residual forces on any direction were less than 0.02 eV/Å. Diffusion barriers were estimated by the nudge elastic band (NEB) variant recently proposed by Henkelman and co-workers,<sup>29</sup> with a force tolerance of 0.02 eV/Å and five intermediate geometries for the transition state search.

## References

- 1 Truflandier, L.; Paris, M.; Payen, C.; Boucher, F. *J. Phys. Chem. B* **2006**, *110*, 21403–21407.
- 2 Mirzae, M.; Hadipour, N. L.; Ahmadi, K. *Biophys. Chem.* **2007**, *125*, 411–415.
- 3 Profeta, M.; Mauri, F.; Pickard, C. *J. Am. Chem. Soc.* **2003**, *125*, 541–548.
- 4 Johnson, B. G.; Gill, P. M. W.; Pople, J. A.; Fox, D. J. *Chem. Phys. Lett.* **1993**, *206*, 239–246.
- 5  $C_Q$  and  $\Delta V_Q$  are often written as  $Q_{cc}$  and  $Q_{zz}$ .
- 6 Frisch, M. J. et al. Gaussian 03 (Revision B.05). 2003.
- 7 del Rosal, I.; Jolibois, F.; Maron, L.; Philippot, K.; Chaudret, B.; Poteau, R. *Dalton Trans.* **2009**, 2142–2156.
- 8 Adamo, C.; Barone, V. *J. Chem. Phys.* **1999**, *110*, 6160–6170.
- 9 Gutmann, T.; Walaszek, B.; Yeping, X.; Waächtler, M.; del Rosal, I.; Grünberg, A.; Poteau, R.; Axet, R.; Lavigne, G.; Chaudret, B.; Limbach, H.-H.; Buntkowsky, G. *J. Am. Chem. Soc.* **2010**, *132*, 11759–11767.
- 10 Becke, A. D. *J. Chem. Phys.* **1993**, *98*, 5648–5652.
- 11 Burke, K.; Perdew, J. P.; Wang, Y. In *Electronic density functional theory: recent progress and new directions*; Dobson, J. F., Vignale, G., Das, M. P., Eds.; Plenum: New-York, 1998; Chapter Derivation of a Generalized Gradient Approximation: the PW91 Density Functional.
- 12 Perdew, J. P. In *Electronic structure of solids*; Ziesche, P., Eschrig, H., Eds.; Akademie: Berlin, 1991; Chapter Unified Theory of Exchange and Correlation Beyond the Local Density Approximation.
- 13 Perdew, J. P.; Chevary, J. A.; Vosko, S. H.; Jackson, K. A.; Pederson, M. R.; Singh, D. J.; Fiolhais, C. *Phys. Rev. B* **1992**, *46*, 6671–6687.
- 14 Perdew, J. P.; Chevary, J. A.; Vosko, S. H.; Jackson, K. A.; Pederson, M. R.; Singh, D. J.; Fiolhais, C. *Phys. Rev. B* **1993**, *48*, 4978.
- 15 Perdew, J. P.; Burke, K.; Wang, Y. *Phys. Rev. B* **1996**, *54*, 16533–16539.
- 16 Perdew, J. P.; Burke, K.; Wang, Y. *Phys. Rev. B* **1998**, *57*, 14999.
- 17 Dolg, M.; Wedig, U.; Stoll, H.; Preuss, H. *J. Chem. Phys.* **1987**, *86*, 866–872.
- 18 Davidson, E. R. *Chem. Phys.* **1996**, *260*, 514–518.
- 19 Woon, D. E.; Dunning, T. H. *J. Chem. Phys.* **1993**, *98*, 1358–1371.
- 20 del Rosal, I.; Gutman, T.; Maron, L.; Jolibois, F.; Philippot, K.; Chaudret, B.; Wakaszek, B.; Limbach, H. H.; Poteau, R.; Buntkowsky, G. *Phys. Chem. Chem. Phys.* **2009**, *11*, 5657–5663.
- 21 Aime, S.; Gobetto, R.; Orlandi, A.; Groombridge, C. J.; Hawkes, G. E.; Mantle, M. D.; Sales, K. D. *Organometallics* **1994**, *13*, 2375–2379.
- 22 Harding, R. A.; Nakayama, H.; Eguchi, T.; Heaton, B. T.; A. K. Smith, B. D. *Polyhedron* **1998**, *17*, 2857–2863.
- 23 Perdew, J. P.; Burke, K.; Ernzerhof, M. *Phys. Rev. Lett.* **1996**, *77*, 3865–3868.
- 24 Perdew, J. P.; Burke, K.; Ernzerhof, M. *Phys. Rev. Lett.* **1997**, *78*, 1396.
- 25 Blöchl, P. *Phys. Rev. B* **1994**, *50*, 17953–17979.
- 26 Kresse, G.; Joubert, D. *Phys. Rev. B* **1999**, *59*, 1758–1775.
- 27 Kresse, G.; Fürthmüller, J. *Phys. Rev. B* **1996**, *54*, 11169–11186.
- 28 Kresse, G.; Fürthmüller, J. *Comput. Mater. Sci.* **1996**, *6*, 15–50.
- 29 Sheppard, D.; Terrell, R.; Henkelman, G. *J. Chem. Phys.* **2008**, *128*, 134106–1–10.
